# Supplementary material for: Efficient semi-transparent organic solar cells enabled by a quasi-heterojunction active layer structure
Source: Royal Society of Chemistry journal article supplement (doi:10.1039/d1tc06096a), 2022-01-01
Supplement: d1tc06096a1.pdf [file d1tc06096a1.pdf]

**Supplementary data for**

**Efficient semi-transparent organic solar cells enabled by a quasi-heterojunction active layer structure**

Hao Tang,<sup>ab</sup> Youzhan Li,<sup>ab</sup> He Liu,<sup>ab</sup> Jiang Wu,<sup>ab</sup> Liang Chen,<sup>a</sup> Yingying Fu,<sup>\*a</sup> and

Zhiyuan Xie<sup>\*ab</sup>

*<sup>a</sup>State Key Laboratory of Polymer Physics and Chemistry, Changchun Institute of Applied Chemistry, Chinese Academy of Sciences, Changchun 130022, P.R.China.*

*<sup>b</sup>School of Applied Chemistry and Engineering, University of Science and Technology of China, Hefei 230026, P. R. China*

Corresponding authors: fyy@ciac.ac.cn (Y.Y. Fu); xiezy\_n@ciac.ac.cn (Z.Y. Xie).

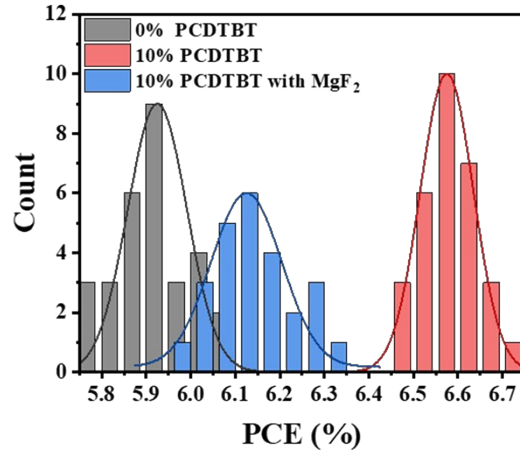

**Fig. S1** The PCE Histogram for the SD-type binary PTB7-Th/IEICO-4Cl ST-OSCs, PTB7-Th:10%PCDTBT/IEICO-4Cl ST-OSCs and PTB7-Th:10% PCDTBT/IEICO-4Cl ST-OSCs covered with 60 nm MgF<sub>2</sub> light out-coupling layer.

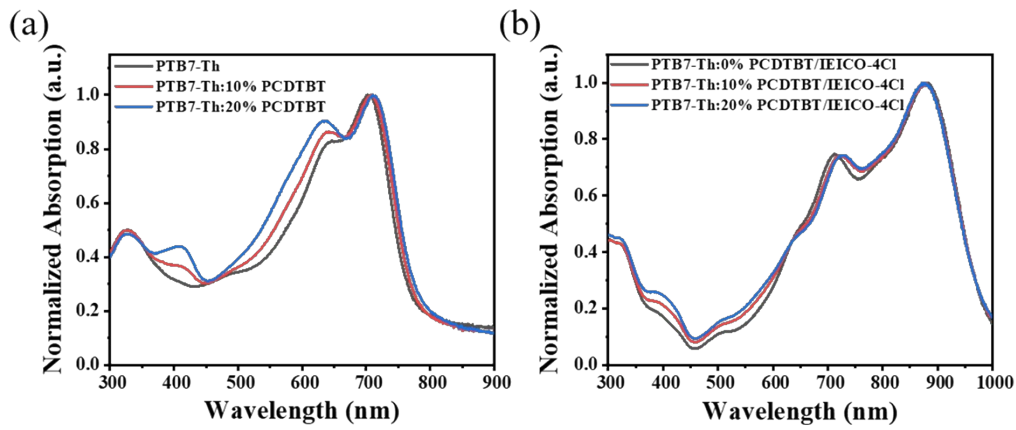

**Fig. S2** Normalized absorption spectra of (a) PTB7-Th:PCDTBT blend films and (b) SD-type PTB7-Th:PCDTBT/IEICO-4Cl ternary films.

**Table S1** Detailed photovoltaic parameters and optical parameters of SD-type PTB7-Th:PCDTBT:IEICO-4Cl based ST-OSCs with different PCDTBT ratio.

| Donor layer        | Device type | $V_{oc}$<br>[V] | $J_{sc}$<br>[mA cm <sup>-2</sup> ] | FF<br>[%] | PCE<br>[%] <sup>a</sup> | AVT<br>[%] |
|--------------------|-------------|-----------------|------------------------------------|-----------|-------------------------|------------|
| PTB7-Th            | SD          | 0.71            | 14.62                              | 59.01     | 6.09 (5.92±0.17)        | 37.69      |
| PTB7-Th:5% PCDTBT  | SD          | 0.69            | 15.64                              | 58.93     | 6.33 (6.22±0.11)        | 37.05      |
| PTB7-Th:10% PCDTBT | SD          | 0.68            | 16.44                              | 59.66     | 6.71 (6.59±0.12)        | 36.07      |
| PTB7-Th:15% PCDTBT | SD          | 0.68            | 16.21                              | 57.17     | 6.32 (6.19±0.13)        | 34.68      |
| PTB7-Th:20% PCDTBT | SD          | 0.68            | 15.93                              | 57.34     | 6.21 (6.03±0.18)        | 33.87      |
| PCDTBT             | SD          | 0.75            | 2.88                               | 43.21     | 0.94 (0.87±0.07)        | 25.29      |

<sup>a</sup> Average results from ten devices.

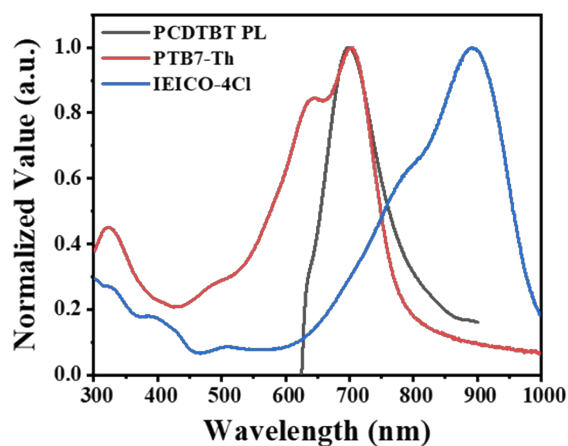

**Fig. S3** The normalized absorption spectra of PTB7-Th and IEICO-4Cl as well as the photoluminescent spectrum of PCDTBT excited at 585 nm.

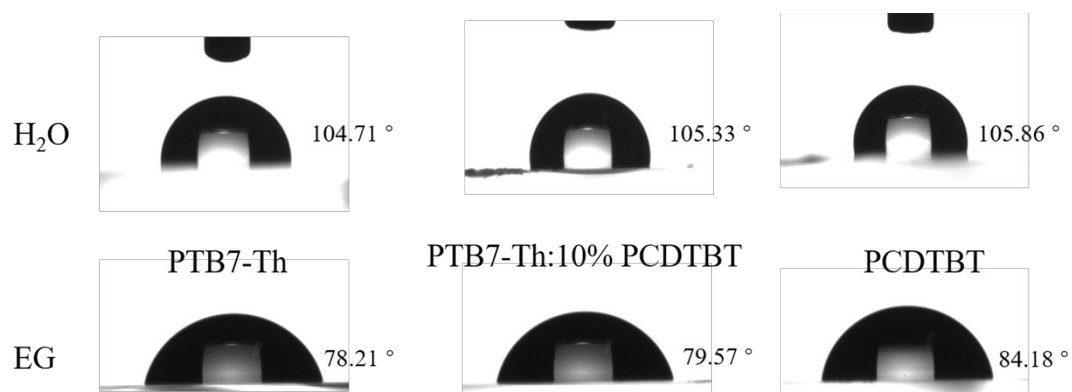

**Fig. S4** The contact angle images of PTB7-Th, PCDTBT and PTB7-Th:10% PCDTBT blend films.

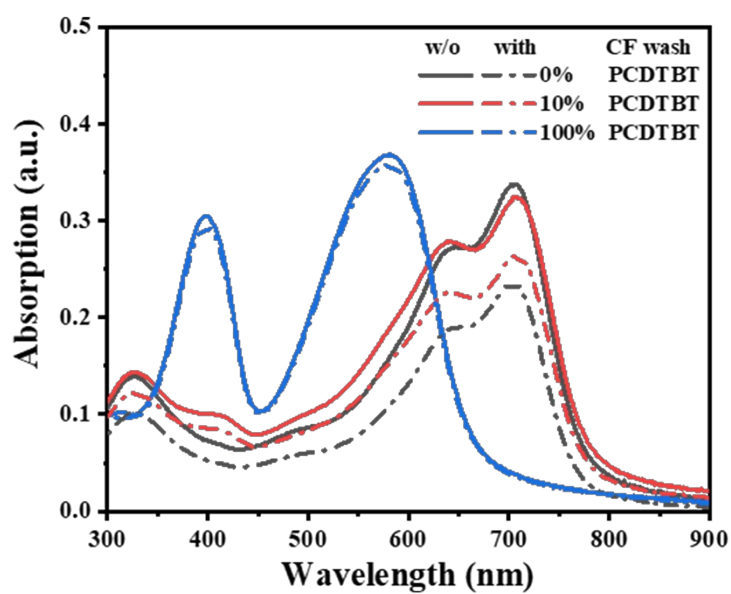

**Fig. S5** Absorption spectra of PTB7-Th, PCDTBT and PTB7-Th:PCDTBT blend films without and with CF spin-rinsing.

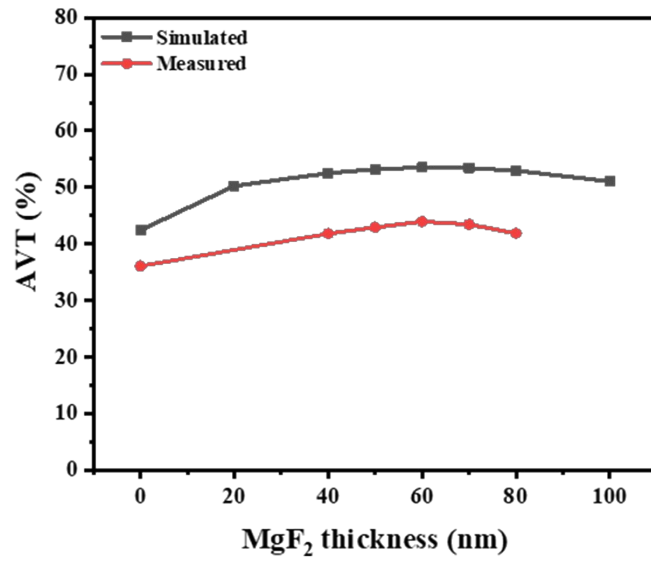

**Fig. S6** The simulated and measured AVT of SD-type 10% PCDTBT ternary ST-OSCs as function of MgF<sub>2</sub> layer thickness.

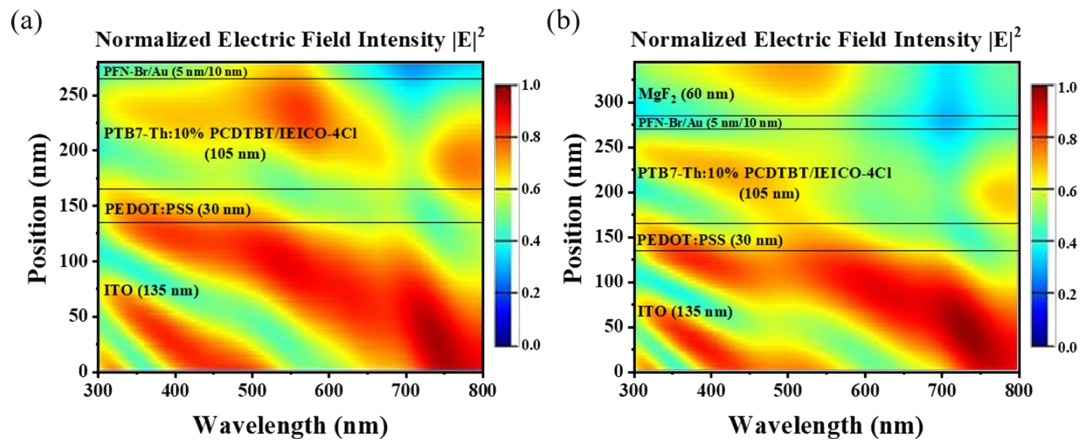

**Fig. S7** Distribution of normalized modulus square of the optical electric field of PTB7-Th:10% PCDTBT:IEICO-4Cl ternary ST-OSCs (a) without MgF<sub>2</sub> (b) and with MgF<sub>2</sub>.
